# Supplementary material
Source: PubMed Central journal article supplement (PMC7455086)
Supplement: jciinsight-5-135982-s091.pdf [file jciinsight-5-135982-s091.pdf]

## Supplemental Material

**Supplemental Table 1.** Background profile of the 10 healthy subjects, 10 pSS patients and 5 disease-control IgG4-RD patients.

| ID               | Sex | Age (yrs) | HLA-DRB1        | Predicted epitope (aa)                    | M3R peptides used for stimulation (aa)                                                       |
|------------------|-----|-----------|-----------------|-------------------------------------------|----------------------------------------------------------------------------------------------|
| Healthy subjects |     |           |                 |                                           |                                                                                              |
| HS1              | F   | 32        | 09:01/<br>09:01 | 34-48,<br>192-207,<br>219-245             | 2)16-35, 3) 31-50 18) 188-200, 19) 196-215,<br>20) 211-230, 21) 226-245                      |
| HS2              | F   | 33        | 04:05/<br>04:05 | 151-167,<br>216-236                       | 15)151-170, 20) 211-230, 21) 226-245                                                         |
| HS3              | F   | 35        | 09:01/<br>09:01 | 34-38,<br>192-207,<br>219-245             | 3) 31-50, 18) 188-200, 19) 196-215,<br>20) 211-230 21) 226-245                               |
| HS4              | F   | 54        | 04:03/<br>15:02 | 96-112,<br>122-142                        | 9) 91-110, 10) 106-117, 12) 121-140,<br>13) 136-147                                          |
| HS5              | M   | 40        | 14:06/<br>16:02 | 163-180,<br>202-219                       | 15) 151-170, 16)166-185, 19) 196-215,<br>20) 211-230                                         |
| HS6              | F   | 62        | 09:01/<br>08:03 | 34-48,<br>163-180,<br>192-206,<br>219-244 | 3) 31-50, 15) 151-170, 16) 166-185,<br>18) 188-200, 19) 196-215,<br>20) 211-230, 21) 226-245 |
| HS7              | F   | 42        | 04:05/<br>14:06 | 151-167,<br>216-236                       | 15) 151-170, 20) 211-230, 21) 226-245                                                        |
| HS8              | F   | 38        | 15:01/<br>15:02 | 83-99,<br>122-141                         | 8) 83-95, 9) 91-110, 12) 121-140,<br>13) 136-147                                             |
| HS9              | F   | 49        | 09:01/<br>15:02 | 96-112,<br>122-142                        | 9) 91-110, 10) 106-117, 12) 121-140,<br>13) 136-147                                          |
| HS10             | M   | 62        | 04:03/<br>15:01 | 81-101,<br>158-173,<br>220-234            | 7) 76-87, 8) 83-95, 9) 91-110, 15) 151-170,<br>16) 166-185, 20) 211-230, 21) 226-245         |
| pSS patients     |     |           |                 |                                           |                                                                                              |
| pSS1             | F   | 80        | 04:10/<br>13:02 | 84-100,<br>504-524                        | 8) 83-95, 9) 91-110, 40) 503-515,<br>41) 511-530                                             |
| pSS2             | F   | 63        | 04:03/<br>15:02 | 96-112,<br>122-142                        | 9) 91-110, 10) 106-117, 12) 121-140,<br>13) 136-147                                          |
| pSS3             | F   | 61        | 08:03/<br>15:01 | 81-101,<br>158-180                        | 7) 76-87, 8) 83-95, 9) 91-110, 15) 151-170,<br>16) 166-185                                   |
| pSS4             | F   | 30        | 04:05/<br>08:02 | 151-167,<br>217-236                       | 15) 151-170, 20) 211-230, 21) 226-245                                                        |

|                                  |   |    |                 |                                |                                                                                      |
|----------------------------------|---|----|-----------------|--------------------------------|--------------------------------------------------------------------------------------|
| pSS5                             | M | 65 | 01:01/<br>15:01 | 81-101,<br>158-180             | 7) 76-87, 8) 83-95, 9) 91-110, 15) 151-170,<br>16) 166-185                           |
| pSS6                             | F | 45 | 04:05/<br>08:03 | 164-180,<br>216-236            | 15) 151-170, 16) 166-185, 20) 211-230,<br>21) 226-245                                |
| pSS7                             | F | 22 | 04:05/<br>08:02 | 151-167,<br>216-236            | 15) 151-170, 20) 211-230, 21) 226-245                                                |
| pSS8                             | F | 79 | 09:01/<br>15:01 | 81-101,<br>158-172,<br>219-234 | 7) 76-87, 8) 83-95, 9) 91-110, 15) 151-170,<br>16) 166-185, 20) 211-230, 21) 226-245 |
| pSS9                             | F | 73 | 08:02/<br>13:02 | 36-51,<br>84-101,<br>528-546   | 3) 31-50, 4) 46-65, 8) 83-95, 9) 91-110,<br>42) 526-545, 43) 541-560                 |
| pSS10                            | M | 80 | 01:01/<br>08:03 | 67-83,<br>163-181,<br>461-476  | 5) 61-72, 6) 68-80, 7) 76-87, 15) 151-170,<br>16) 166-185, 36) 451-470, 37) 466-485  |
| Disease-control IgG4-RD patients |   |    |                 |                                |                                                                                      |
| IgG4-<br>RD1                     | F | 72 | 09:01/<br>15:01 | 83-100,<br>158-172,<br>219-234 | 8) 83-95, 9) 91-110, 15) 151-170,<br>16) 166-185, 20) 211-230, 21) 226-245           |
| IgG4-<br>RD2                     | M | 60 | 04:05/<br>08:02 | 151-167,<br>216-236            | 15) 151-170, 20) 211-230, 21) 226-245                                                |
| IgG4-<br>RD3                     | M | 51 | 12:02/<br>13:02 | 82-100,<br>528-546             | 7) 76-87, 8) 83-95, 9) 91-110, 42) 526-545,<br>43) 541-560                           |
| IgG4-<br>RD4                     | M | 70 | 01:01/<br>01:01 | 66-86,<br>145-159,<br>193-207  | 5) 61-72, 6) 68-80, 7) 76-87, 14) 143-155,<br>15) 151-170, 18) 188-200, 19) 196-215  |
| IgG4-<br>RD5                     | M | 51 | 04:06/<br>15:01 | 81-101,<br>158-173,<br>220-234 | 15) 151-170, 16) 166-185, 19) 196-215,<br>20) 211-230                                |

5 All participants underwent HLA-DRB1 typing, and HLA binding 15-mer peptides from the full sequence M3R (590AA), were predicted by Immune Epitope Database (IEDB) ranked by IC50 value. We selected top 10 ranking M3R peptides for each case, assuming that the T cell epitope would be included in the selected peptides. Table shows the selected M3R peptides for stimulation for each subject. Numbers

10 represent the number of M3R full sequence amino acid described in Supplementary Table 1. The clinical profiles of the subjects were collected from the medical records. aa: amino acid number.

**Supplemental Table 2.** Synthesized M3R peptides.

| n  | AA      | portion         |
|----|---------|-----------------|
| 1  | 1-20    | NT              |
| 2  | 16-35   | NT              |
| 3  | 31-50   | NT              |
| 4  | 46-65   | NT              |
| 5  | 61-72   | NT-TM1          |
| 6  | 68-80   | TM1             |
| 7  | 76-87   | TM1             |
| 8  | 83-95   | TM1-CL1         |
| 9  | 91-110  | TM1-CL1-<br>TM2 |
| 10 | 106-117 | TM2             |
| 11 | 113-125 | TM2             |
| 12 | 121-140 | TM2-EL1         |
| 13 | 136-147 | EL1-TM3         |
| 14 | 143-155 | TM3             |
| 15 | 151-170 | TM3-CL2         |
| 16 | 166-185 | CL2-TM4         |
| 17 | 181-192 | CL2-TM4         |
| 18 | 188-200 | TM4             |
| 19 | 196-215 | TM4-EL2         |
| 20 | 211-230 | EL2-TM5         |
| 21 | 226-245 | EL2-TM5         |
| 22 | 241-260 | TM5-CL3         |
| 23 | 256-275 | CL3             |
| 24 | 271-290 | CL3             |
| 25 | 286-305 | CL3             |
| 26 | 301-320 | CL3             |
| 27 | 316-335 | CL3             |
| 28 | 331-350 | CL3             |
| 29 | 346-365 | CL3             |
| 30 | 361-380 | CL3             |
| 31 | 376-395 | CL3             |
| 32 | 391-410 | CL3             |
| 33 | 406-425 | CL3             |
| 34 | 421-440 | CL3             |
| 35 | 436-455 | CL3             |
| 36 | 451-470 | CL3             |
| 37 | 466-485 | CL3             |
| 38 | 481-500 | CL3-TM6         |
| 39 | 496-507 | TM6             |
| 40 | 503-515 | TM6-EL3         |
| 41 | 511-530 | EL3             |
| 42 | 526-545 | EL3-TM7         |

|    |         |        |
|----|---------|--------|
| 43 | 541-560 | TM7-CT |
| 44 | 556-575 | CT     |
| 45 | 571-590 | CT     |

---

15

45 types of M3R peptides, each composed of 12-20-mers with overlapping 4-5-mers, were prepared, altogether covering the full M3R sequence. Data are the 45 types of M3R peptides and the portions of the M3R peptides. n: Number of peptides, AA: Amino acid number from the M3R full sequence, NT: N terminal, TM:

20 Transmembrane, CL: Cytoplasmic loop, EL: Extracellular loop, CT: C terminal

## Supplemental Figure 1

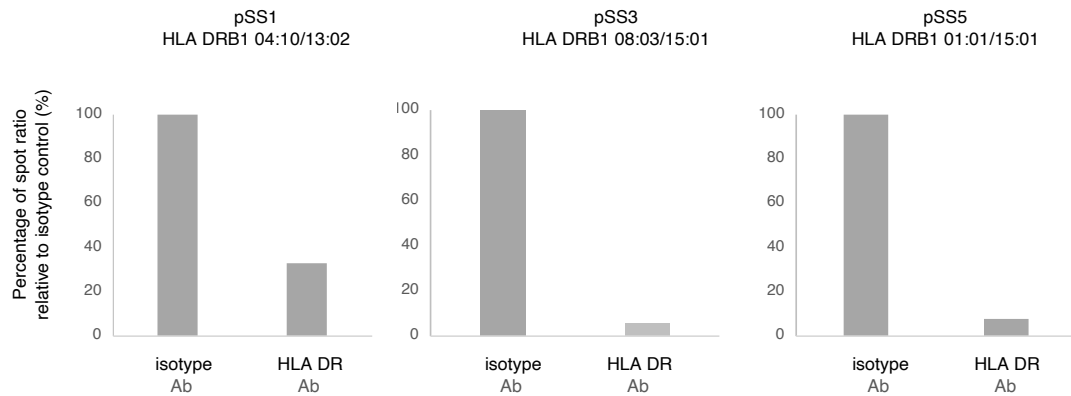

### Supplemental Figure 1. HLA-DR blocking of M3R AA83-95 reactivity.

HLA DR restriction of M3R AA83-95 reactivity of Th17 cells was assessed using ELISpot after HLA DR blocking with anti HLA-DR antibody. Three pSS patients positive for M3R-reactive Th17 cells were evaluated, all showing decreased spots after HLA DR blocking procedure compared with isotype antibody. Inhibition ratio of HLA DR antibody, compared with isotype antibody described as 100% are shown. Replicate three wells were examined under each condition.

25

## Supplemental Figure 2

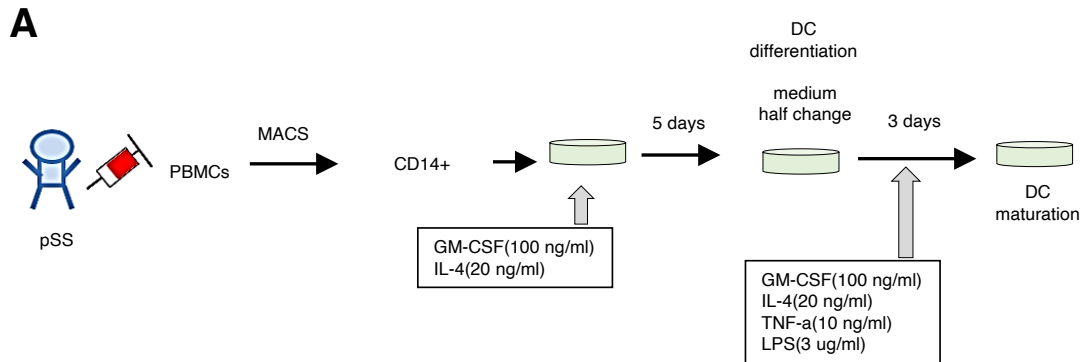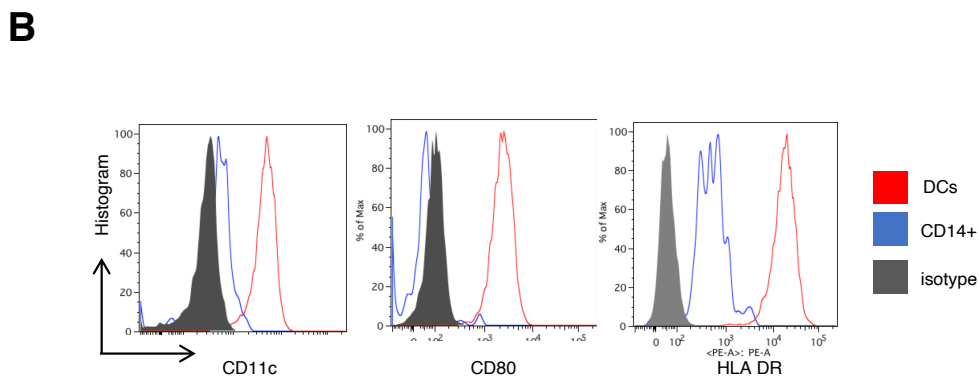

30

### Supplemental Figure 2. Generation of monocyte-derived dendritic cells.

Dendritic cells (DCs) were generated from CD14<sup>+</sup> monocyte isolated from PBMCs using the method described in detail previously (20).

(A) Procedure used to prepare DCs from CD14<sup>+</sup> cells. CD14<sup>+</sup> cells isolated by positive fraction of MACS, were cultured with GM-CSF (100 ng/ml) and IL-4 (10 ng/ml). After 5-day culture, the cells were treated with LPS (3  $\mu$ g/ml), IL-4 (20 ng/ml), and TNF- $\alpha$  (10 ng/ml) for 3 days. The purity of the isolated CD14<sup>+</sup> cells was >95%.

(B) Representative FACS data of monocyte-derived DCs. Differentiation of DCs was confirmed by flow cytometry and staining for HLA-DR-PE (clone L243), CD80-PECy7 (clone 2D10), and CD11c-APC (clone 3.9). CD11c, CD80, HLA DR were highly expressed in mature DCs compared to isolated CD14<sup>+</sup> cells.

40

### Supplemental Figure 3

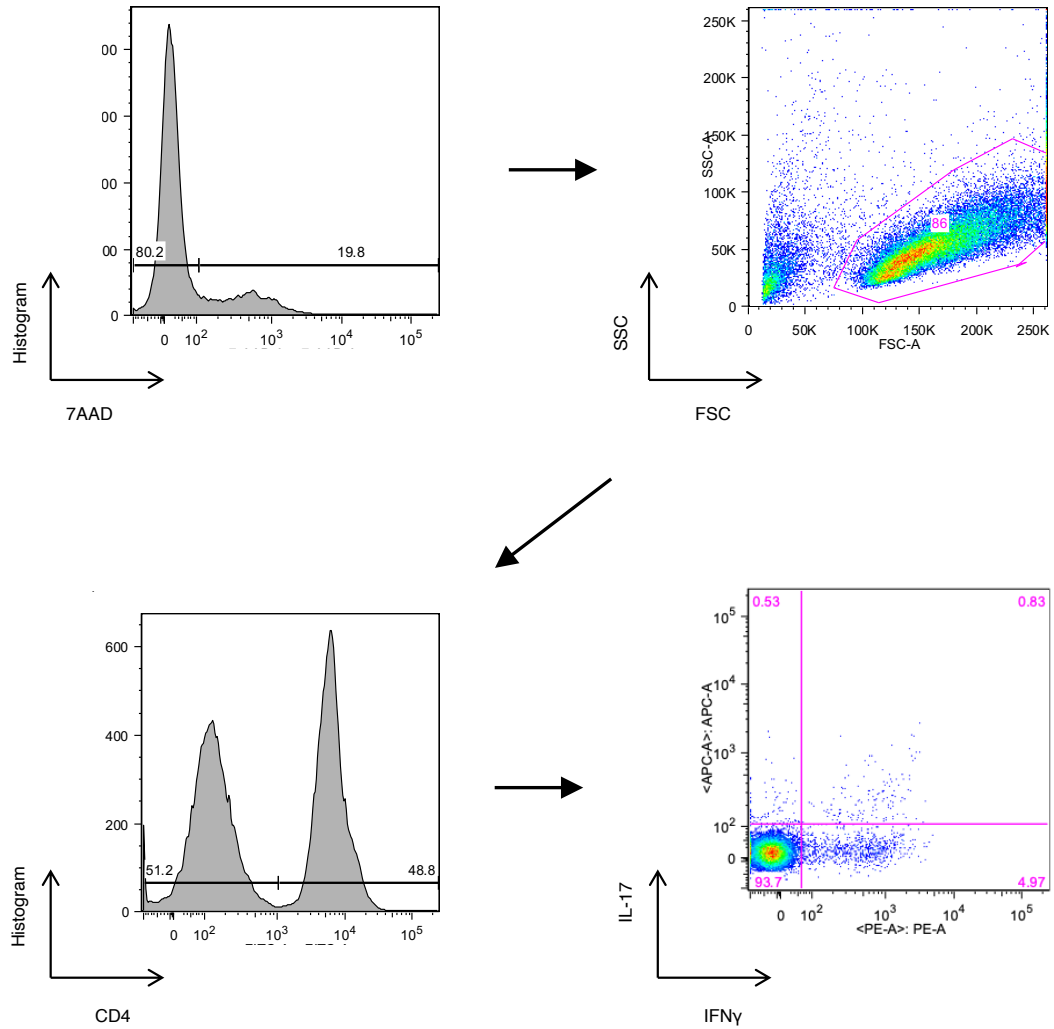

**Supplemental Figure 3.** Gating strategy of M3R induced IL-17, IFN $\gamma$  production with flow cytometry.

45

7-AAD was stained to gate out dead cells. Among scatter gate for lymphocyte, CD4 positive cells were assessed for IL-17, and IFN $\gamma$  production.
